# Supplementary material for: Pregnancy and Postpartum Nutritional Wants and Needs in Athletes: A Cross-Sectional Survey in the United Kingdom and Republic of Ireland
Source: Research Square preprint supplement (doi:10.21203/rs.3.rs-8309897/v1), 2025-12-19

**Performance Nutrition**

**Pregnancy and Postpartum Nutritional Wants and Needs in Athletes: A Cross-Sectional Survey in the United Kingdom and Republic of Ireland**

Additional file 2. Reported changes in training behaviours across trimesters during pregnancy


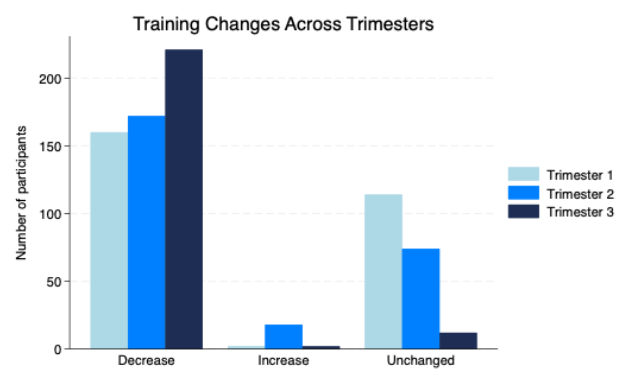

Supplement: Supplementary file 1 [file 48ab72795d13b3f4ce74b724.docx]
