# Supplementary material for: Pregnancy and Postpartum Nutritional Wants and Needs in Athletes: A Cross-Sectional Survey in the United Kingdom and Republic of Ireland
Source: Research Square preprint supplement (doi:10.21203/rs.3.rs-8309897/v1), 2025-12-19
Supplement: Supplementary file 2 [file 87575e97821a9c2870b72366.docx]

**Performance Nutrition**

**Pregnancy and Postpartum Nutritional Wants and Needs in Athletes: A Cross-Sectional Survey in the United Kingdom and Republic of Ireland**

Additional file 3. Prevalence of Pregnancy Symptoms (%)

|  | Overall  (n =287) | Tier 3-5: Elite  (n=126) | Tier 1-2: Active Non-Elite  (n=161) |
| --- | --- | --- | --- |
| Anxiety about child’s health and development |  |  |  |
| *Never* | 21.3 | 23.0 | 19.9 |
| *First Trimester* | 63.8 | 61.9 | 65.2 |
| *Second Trimester* | 43.9 | 45.2 | 42.9 |
| *Third Trimester* | 39.7 | 42.1 | 37.9 |
| Anxiety about delivery |  |  |  |
| *Never* | 29.6 | 31.0 | 28.6 |
| *First Trimester* | 24.7 | 23.0 | 26.1 |
| *Second Trimester* | 27.9 | 27.0 | 28.6 |
| *Third Trimester* | 51.6 | 55.6 | 48.4 |
| Back Pain |  |  |  |
| *Never* | 36.9 | 37.3 | 36.6 |
| *First Trimester* | 8.4 | 9.5 | 7.5 |
| *Second Trimester* | 22.6 | 21.4 | 23.6 |
| *Third Trimester* | 46.7 | 50.0 | 44.1 |
| Constipation |  |  |  |
| *Never* | 43.9 | 43.7 | 44.1 |
| *First Trimester* | 27.2 | 26.2 | 28.0 |
| *Second Trimester* | 12.9 | 22.2 | 5.6 |
| *Third Trimester* | 28.9 | 31.7 | 26.7 |
| Fatigue |  |  |  |
| *Never* | 4.9 | 6.3 | 3.7 |
| *First Trimester* | 80.5 | 81.7 | 79.5 |
| *Second Trimester* | 38.3 | 40.5 | 36.6 |
| *Third Trimester* | 63.1 | 65.9 | 60.9 |
| Faecal Incontinence |  |  |  |
| *Never* | 90.2 | 91.3 | 89.4 |
| *First Trimester* | 1.4 | 2.4 | 0.6 |
| *Second Trimester* | 1.0 | 0.8 | 1.2 |
| *Third Trimester* | 1.0 | 0.8 | 1.2 |
| Headaches |  |  |  |
| *Never* | 32.8 | 55.6 | 14.9 |
| *First Trimester* | 19.9 | 25.4 | 15.5 |
| *Second Trimester* | 18.5 | 18.3 | 18.6 |
| *Third Trimester* | 16.4 | 17.5 | 15.5 |
| Heartburn or Indigestion |  |  |  |
| *Never* | 28.9 | 31.0 | 27.3 |
| *First Trimester* | 17.1 | 19.8 | 14.9 |
| *Second Trimester* | 28.6 | 34.1 | 24.2 |
| *Third Trimester* | 47.4 | 47.6 | 47.2 |
| Low Mood |  |  |  |
| *Never* | 50.9 | 56.3 | 46.6 |
| *First Trimester* | 32.4 | 31.0 | 33.5 |
| *Second Trimester* | 15.7 | 23.0 | 9.9 |
| *Third Trimester* | 20.2 | 20.6 | 19.9 |
| Mood Swings |  |  |  |
| *Never* | 38.7 | 41.3 | 36.6 |
| *First Trimester* | 38.3 | 37.3 | 39.1 |
| *Second Trimester* | 26.5 | 27.0 | 26.1 |
| *Third Trimester* | 34.8 | 37.3 | 32.9 |
| Nausea and/or Vomiting |  |  |  |
| *Never* | 18.8 | 19.0 | 18.6 |
| *First Trimester* | 70.0 | 75.4 | 65.8 |
| *Second Trimester* | 79.1 | 96.8 | 65.2 |
| *Third Trimester* | 11.5 | 13.5 | 9.9 |
| Pelvic Pain |  |  |  |
| *Never* | 39.7 | 30.2 | 47.2 |
| *First Trimester* | 9.8 | 14.3 | 6.2 |
| *Second Trimester* | 24.0 | 28.6 | 20.5 |
| *Third Trimester* | 41.5 | 39.7 | 42.9 |
| Physical Discomfort |  |  |  |
| *Never* | 15.0 | 24.6 | 7.5 |
| *First Trimester* | 16.4 | 14.3 | 18.0 |
| *Second Trimester* | 28.6 | 24.6 | 31.7 |
| *Third Trimester* | 67.2 | 30.2 | 96.3 |
| Poor Motivation |  |  |  |
| *Never* | 54.4 | 31.7 | 72.0 |
| *First Trimester* | 33.4 | 35.7 | 31.7 |
| *Second Trimester* | 15.7 | 17.5 | 14.3 |
| *Third Trimester* | 36.6 | 34.9 | 37.9 |
| Prenatal Depression |  |  |  |
| *Never* | 81.9 | 82.5 | 81.4 |
| *First Trimester* | 7.7 | 9.5 | 6.2 |
| *Second Trimester* | 5.2 | 8.7 | 2.5 |
| *Third Trimester* | 7.0 | 7.9 | 6.2 |
| Swollen ankles, feet and fingers |  |  |  |
| *Never* | 55.7 | 38.9 | 68.9 |
| *First Trimester* | 0.7 | 1.6 | 0.0 |
| *Second Trimester* | 5.6 | 4.0 | 6.8 |
| *Third Trimester* | 34.8 | 36.5 | 33.5 |
| Urinary Incontinence |  |  |  |
| *Never* | 67.2 | 65.1 | 68.9 |
| *First Trimester* | 5.2 | 7.1 | 3.7 |
| *Second Trimester* | 5.9 | 2.4 | 8.7 |
| *Third Trimester* | 98.3 | 96.0 | 100.0 |
