# Supplementary material for: Pregnancy and Postpartum Nutritional Wants and Needs in Athletes: A Cross-Sectional Survey in the United Kingdom and Republic of Ireland
Source: Research Square preprint supplement (doi:10.21203/rs.3.rs-8309897/v1), 2025-12-19
Supplement: Supplementary file 3 [file 9d5b415498edc10580c7f0f2.docx]

**Performance Nutrition**

**Pregnancy and Postpartum Nutritional Wants and Needs in Athletes: A Cross-Sectional Survey in the United Kingdom and Republic of Ireland**

Additional file 1. Strengthening the reporting of observational studies in epidemiology (STROBE) - Checklist of items that should be included in reports of ***cross-sectional studies***

|  | **Item No** |  | | | **Recommendation** | | **Page #** | |
| --- | --- | --- | --- | --- | --- | --- | --- | --- |
| **Title and abstract** | 1 |  | | | (*a*) Indicate the study’s design with a commonly used term in the title or the abstract | | 1 | |
|  | | | (*b*) Provide in the abstract an informative and balanced summary of what was done and what was found | | 1 | |
|  | | | **Introduction** | | | |  | |
| Background/rationale | 2 |  | | | Explain the scientific background and rationale for the investigation being reported | | 3-4 | |
| Objectives | 3 |  | | | State specific objectives, including any prespecified hypotheses | | 4 | |
|  | | | **Methods** | | | |  | |
| Study design | 4 |  | | | Present key elements of study design early in the paper | | 3,4 | |
| Setting | 5 |  | | | Describe the setting, locations, and relevant dates, including periods of recruitment, exposure, follow-up, and data collection | | 4 | |
| Participants | 6 |  | | | (*a*) Give the eligibility criteria, and the sources and methods of selection of participants | | 4 | |
| Variables | 7 |  | | | Clearly define all outcomes, exposures, predictors, potential confounders, and effect modifiers. Give diagnostic criteria, if applicable | | 5 | |
| Data sources/ measurement | 8* |  | | | For each variable of interest, give sources of data and details of methods of assessment (measurement). Describe comparability of assessment methods if there is more than one group | | 5 & Table 1 | |
| Bias | 9 |  | | | Describe any efforts to address potential sources of bias | | NA | |
| Study size | 10 |  | | | Explain how the study size was arrived at | | 6 | |
| Quantitative variables | 11 |  | | | Explain how quantitative variables were handled in the analyses. If applicable, describe which groupings were chosen and why | | 6 | |
| Statistical methods | 12 |  | | | (*a*) Describe all statistical methods, including those used to control for confounding | | 6 | |
|  | | | (*b*) Describe any methods used to examine subgroups and interactions | | 6 | |
|  | | | (*c*) Explain how missing data were addressed | | 6 | |
|  | | | (*d*) If applicable, describe analytical methods taking account of sampling strategy | | NA | |
|  | | | (*e*) Describe any sensitivity analyses | | NA | |
|  | | | **Results** | | | |  | |
| Participants | 13* |  | | | (a) Report numbers of individuals at each stage of study—eg numbers potentially eligible, examined for eligibility, confirmed eligible, included in the study, completing follow-up, and analysed | | 7 | |
|  | | | (b) Give reasons for non-participation at each stage | | 7 | |
|  | | | (c) Consider use of a flow diagram | | NA | |
| Descriptive data | 14* |  | | | (a) Give characteristics of study participants (eg demographic, clinical, social) and information on exposures and potential confounders | | 7, Table 2 | |
|  | | | (b) Indicate number of participants with missing data for each variable of interest | | NA | |
| Outcome data | 15* |  | | | Report numbers of outcome events or summary measures | | 7-14, Tables 3-6 | |
| Main results | 16 |  | | | (*a*) Give unadjusted estimates and, if applicable, confounder-adjusted estimates and their precision (eg, 95% confidence interval). Make clear which confounders were adjusted for and why they were included | | NA | |
|  | | | (*b*) Report category boundaries when continuous variables were categorized | | 7-14 | |
|  | | | (*c*) If relevant, consider translating estimates of relative risk into absolute risk for a meaningful time period | | NA | |
| Other analyses | 17 |  | | | Report other analyses done—eg analyses of subgroups and interactions, and sensitivity analyses | | 11,13 | |
|  | | | **Discussion** | | | |  | |
| Key results | 18 |  | | | Summarise key results with reference to study objectives | | 15-16 | |
| Limitations | 19 |  | | | Discuss limitations of the study, taking into account sources of potential bias or imprecision. Discuss both direction and magnitude of any potential bias | | 16 | |
| Interpretation | 20 |  | | | Give a cautious overall interpretation of results considering objectives, limitations, multiplicity of analyses, results from similar studies, and other relevant evidence | | 17 | |
| Generalisability | 21 |  | | | Discuss the generalisability (external validity) of the study results | | 16 | |
|  | | | **Other information** | | | |  | |
| Funding | 22 |  | | | Give the source of funding and the role of the funders for the present study and, if applicable, for the original study on which the present article is based | | 2 | |
|  |  |  | |  | |  | |  | |
